# Supplementary material
Source: publisher figshare collection journal article supplement (https://tandf.figshare.com/articles/dataset/_/4286339)
Supplement: Supplementary file 1 [file 1]

Archive with 2 entries (2 files):
- Supplemental_file_1_Goals_in_ImPACT_Wielaert_et_al.pdf
- Supplemental_file_2_PACT_Partner_interview_Wielaert_et_al.pdf
